# Supplementary material for: Tinea Incognito—A Great Physician Pitfall
Source: MDPI journal article supplement (doi:10.3390/jof8030312), 2022-03-18
Supplement: s1 [file s1]

## SUPPLEMENTARY FILES

**Table S1. The most common conditions that could be mistaken with tinea depending on the particular location.**

| Face tinea                                                                                                | Trunk tinea                                                                                            |
|-----------------------------------------------------------------------------------------------------------|--------------------------------------------------------------------------------------------------------|
| eczema<br>demodecosis<br>seborrhoeic dermatitis<br>lupus erythematosus<br>rosacea<br>impetigo contagiosum | eczema<br>lupus erythematosus<br>psoriasis<br>drug eruptions<br>lichen planus<br>impetigo contagiosum  |
| Groin tinea                                                                                               | Limbs tinea                                                                                            |
| eczema<br>erythrasma<br>psoriasis                                                                         | eczema<br>psoriasis<br>drug eruptions<br>lichen planus<br>lesions associated with venous insufficiency |

**Table S2. The list of topical and oral antifungal drugs available in our country.**

| Topical drugs     |                                                    | Oral drugs   |             |
|-------------------|----------------------------------------------------|--------------|-------------|
| Name              | Formulation                                        | Name         | Formulation |
| terbinafine       | cream, aerosole                                    | terbinafine  | tablets     |
| clotrimazole      | cream, intravaginal capsules, liquid               | itraconazole | capsules    |
| econazole         | cream                                              | fluconazole  | capsules    |
| fenticonazole     | intravaginal capsules                              | voriconazole | tablets     |
| izoconazole       | cream                                              | ketoconazole | tablets     |
| ketoconazole      | cream, shampoo                                     |              |             |
| miconazole        | cream, powder, gel, intravaginal tablets, aerosole |              |             |
| posaconazole      | suspension                                         |              |             |
| cyclopiroxolamine | liquid, cream                                      |              |             |
| cyclopirox        | nail lacquer                                       |              |             |
| amorolfine        | nail lacquer                                       |              |             |
